# Supplementary material for: Electrochemical performance of l-tryptophanium picrate as an efficient electrode material for supercapacitor application
Source: Royal Society of Chemistry journal article supplement (doi:10.1039/c9cp02536g), 2019-01-01
Supplement: c9cp02536g1.pdf [file c9cp02536g1.pdf]

## Electrochemical Performance of L-Tryptophanium picrate as an efficient electrode material for Supercapacitor Application

**Rajkumar Srinivasan <sup>a</sup>, Elanthamilan Elaiyappillai <sup>a</sup>, S. Gowri <sup>b,\*</sup>, A. Bella <sup>a</sup>, A. Sathiyar <sup>a</sup>, B. Meenatchi <sup>a</sup>, Johnson Princy Merlin <sup>a,\*</sup>**

<sup>a</sup> Department of Chemistry, Bishop Heber College, Tiruchirappalli-620 017, Tamil Nadu, India.

<sup>b</sup> Department of Physics, Cauvery College for Women, Tiruchirappalli-620 018, Tamil Nadu India.

Corresponding Authors:

1. J. P. Merlin

E-mail: pmej\_68@yahoo.co.in

2. S. Gowri

E-mail: gow.1976@gmail.com

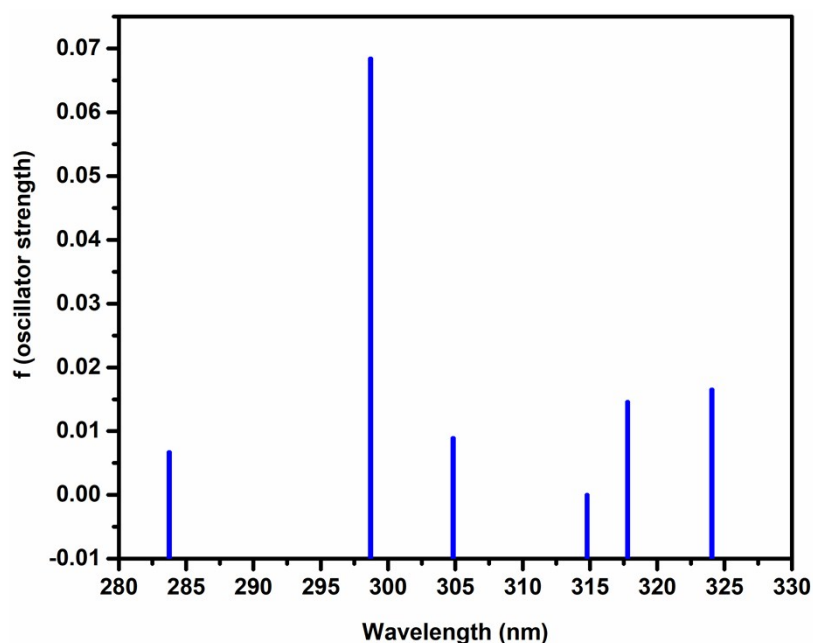

Fig.S1 Uv-vis Spectrum of L-Tryptophanium picrate at cam- B3LYP/6-31+G (d,p)

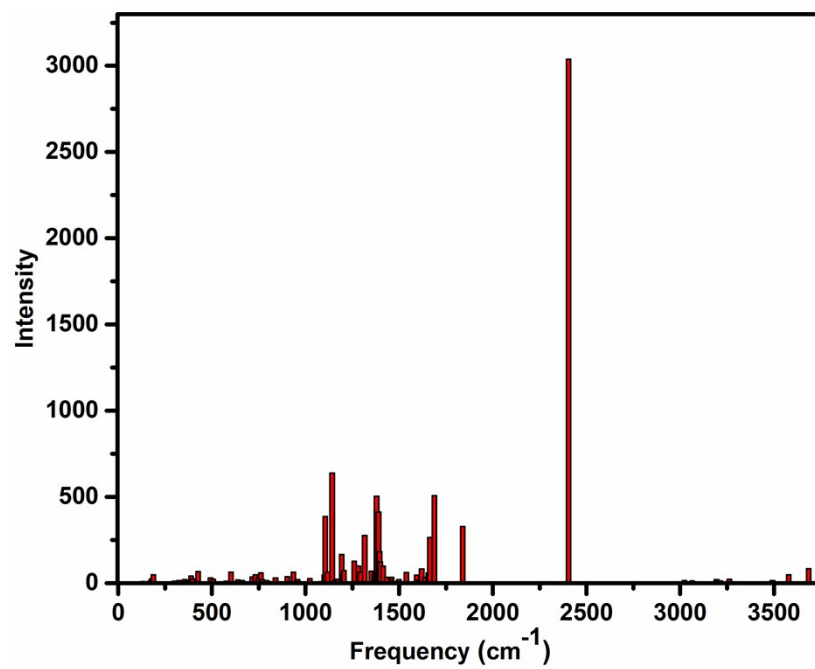

**Fig.S2 IR Spectrum of L-Tryptophanium picrate at B3LYP/6-31+G (d,p)**
